# Supplementary material for: Patterns of Plumericin Concentration in Leaves of Himatanthus tarapotensis (Apocynaceae) and Its Interactions with Herbivory in the Peruvian Amazon
Source: MDPI journal article supplement (doi:10.3390/plants11081011), 2022-04-08
Supplement: s1 [file s1]

# SUPPLEMENTARY MATERIAL

**TABLE S1** Plumericin concentration from leaves of juvenile plants of *Himatanthus tarapotensis* collected in clay soil forests (CS) and white-sand soil forests (WS) during the dry and rainy season of the Amazon

| Specimen Number | Habitat                     | Plumericin concentration (mg/100 g of dry leaves)<br>(mean values $\pm$ standard deviation) |                     |                     |                     |
|-----------------|-----------------------------|---------------------------------------------------------------------------------------------|---------------------|---------------------|---------------------|
|                 |                             | Precipitation periods                                                                       |                     |                     |                     |
|                 |                             | Dry                                                                                         |                     | Rainy               |                     |
|                 |                             | May 2014                                                                                    | August 2014         | November 2014       | January 2015        |
| 01              | Clay soil forest (CS)       | 0.30 ( $\pm$ 0.01)                                                                          | 10.90 ( $\pm$ 0.97) | 1.14 ( $\pm$ 0.06)  | 0.94 ( $\pm$ 0.03)  |
| 02              |                             | 9.49 ( $\pm$ 0.55)                                                                          | 8.73 ( $\pm$ 0.34)  | 21.51 ( $\pm$ 1.88) | 11.93 ( $\pm$ 0.25) |
| 03              |                             | 4.36 ( $\pm$ 0.18)                                                                          | 18.59 ( $\pm$ 0.45) | 3.71 ( $\pm$ 0.13)  | 2.63 ( $\pm$ 0.19)  |
| 04              |                             | 27.73 ( $\pm$ 2.05)                                                                         | 64.39 ( $\pm$ 1.22) | 14.61 ( $\pm$ 0.12) | 22.82 ( $\pm$ 0.85) |
| 05              |                             | 19.74 ( $\pm$ 1.26)                                                                         | 49.54 ( $\pm$ 2.80) | 46.96 ( $\pm$ 2.77) | 94.79 ( $\pm$ 0.82) |
| 06              |                             | 14.86 ( $\pm$ 0.56)                                                                         | 61.21 ( $\pm$ 3.14) | 6.25 ( $\pm$ 0.10)  | 21.27 ( $\pm$ 1.10) |
| 07              |                             | 15.81 ( $\pm$ 1.13)                                                                         | 34.58 ( $\pm$ 1.11) | 3.36 ( $\pm$ 0.06)  | 18.81 ( $\pm$ 0.86) |
| 08              |                             | 15.07 ( $\pm$ 1.71)                                                                         | 15.87 ( $\pm$ 1.66) | 11.36 ( $\pm$ 0.34) | 9.25 ( $\pm$ 1.06)  |
| 09              |                             | 14.58 ( $\pm$ 0.47)                                                                         | 35.77 ( $\pm$ 0.16) | 3.41 ( $\pm$ 0.23)  | 18.15 ( $\pm$ 1.32) |
| 10              |                             | 6.48 ( $\pm$ 0.20)                                                                          | 11.53 ( $\pm$ 0.13) | 10.60 ( $\pm$ 0.71) | 25.60 ( $\pm$ 1.11) |
| 11              |                             | 3.31 ( $\pm$ 0.38)                                                                          | 28.80 ( $\pm$ 2.51) | 11.87 ( $\pm$ 0.51) | 8.94 ( $\pm$ 0.49)  |
| 12              |                             | 45.08 ( $\pm$ 2.05)                                                                         | 68.76 ( $\pm$ 1.15) | 33.80 ( $\pm$ 0.89) | 80.56 ( $\pm$ 2.51) |
| 13              | White-sand soil forest (WS) | 5.67 ( $\pm$ 0.52)                                                                          | 49.63 ( $\pm$ 2.34) | 1.14 ( $\pm$ 0.03)  | 5.54 ( $\pm$ 0.29)  |
| 14              |                             | 3.22 ( $\pm$ 0.07)                                                                          | 9.93 ( $\pm$ 0.41)  | 2.56 ( $\pm$ 0.17)  | 31.66 ( $\pm$ 1.97) |
| 15              |                             | 4.15 ( $\pm$ 0.40)                                                                          | 7.25 ( $\pm$ 0.18)  | 12.54 ( $\pm$ 1.37) | 16.21 ( $\pm$ 0.46) |
| 16              |                             | 18.12 ( $\pm$ 0.79)                                                                         | 4.46 ( $\pm$ 0.18)  | 2.19 ( $\pm$ 0.07)  | 39.02 ( $\pm$ 0.33) |
| 17              |                             | 9.75 ( $\pm$ 0.35)                                                                          | 11.21 ( $\pm$ 0.42) | 7.48 ( $\pm$ 0.69)  | 32.39 ( $\pm$ 0.46) |

**TABLE S2** Values of 18 physical-chemical variables of superficial soil (0–15 cm depth) of clay soils (CS) and white-sand soils (WS) from the IIAP Biological Station (CE = electric conductivity; P = phosphorus; K = potassium; CEC = cation-exchange capacity; Ca = calcium; Mg = magnesium; Na = sodium; Al = aluminum; H = hydrogen; C = carbon)

| Physico-chemical variables       | Sampling sites                    |      |           |      |       |      |       |
|----------------------------------|-----------------------------------|------|-----------|------|-------|------|-------|
|                                  | White-Sand Soil                   |      | Clay Soil |      |       |      |       |
|                                  | 01                                | 02   | 03        | 04   | 05    | 06   | 07    |
| Sand / %                         | 87                                | 89   | 41        | 63   | 49    | 51   | 53    |
| Silt / %                         | 5                                 | 5    | 41        | 27   | 35    | 37   | 31    |
| Clay / %                         | 8                                 | 6    | 18        | 10   | 16    | 12   | 16    |
| pH (1:1)                         | 4.60                              | 4.19 | 4.10      | 4.24 | 4.31  | 4.15 | 3.83  |
| CE (1:1) / dS m <sup>-1</sup>    | 0.08                              | 0.07 | 0.06      | 0.04 | 0.07  | 0.07 | 0.06  |
| Organic matter / %               | 0.84                              | 0.77 | 3.94      | 1.68 | 3.20  | 2.09 | 3.13  |
| P / ppm                          | 1.2                               | 2.6  | 1.4       | 1.7  | 2.8   | 1.9  | 2.7   |
| K / ppm                          | 96                                | 69   | 44        | 68   | 39    | 27   | 45    |
| CEC / meq 100 g                  | 4.80                              | 3.52 | 17.28     | 7.68 | 13.44 | 9.12 | 11.52 |
| Exchangeable Cations / meq 100 g | Ca <sup>2+</sup>                  | 0.33 | 0.47      | 0.76 | 0.42  | 1.55 | 1.57  |
|                                  | Mg <sup>2+</sup>                  | 0.23 | 0.23      | 0.38 | 0.32  | 0.50 | 0.30  |
|                                  | K <sup>+</sup>                    | 0.11 | 0.10      | 0.17 | 0.14  | 0.23 | 0.15  |
|                                  | Na <sup>+</sup>                   | 0.09 | 0.07      | 0.09 | 0.09  | 0.05 | 0.09  |
|                                  | Al <sup>3+</sup> + H <sup>+</sup> | 0.50 | 0.10      | 4.90 | 1.70  | 2.60 | 1.30  |
| Sum of cations                   | 1.26                              | 0.97 | 6.30      | 2.66 | 4.93  | 3.41 | 5.03  |
| Sum of bases                     | 0.76                              | 0.87 | 1.40      | 0.96 | 2.33  | 2.11 | 1.03  |
| Saturation of bases / %          | 16                                | 25   | 8         | 13   | 17    | 23   | 9     |
| C / %                            | 0.49                              | 1.81 | 0.45      | 2.28 | 1.85  | 1.21 | 1.81  |

**TABLE S3** Student *t*-test for comparison of physical-chemical parameters of superficial soil (0–15 cm depth) from clay soil forests (CS) and white-sand soil forests (WS) of the study area

| Soil parameters                     | Total       | CS          | WS          | <i>p</i> <sup>a</sup> |
|-------------------------------------|-------------|-------------|-------------|-----------------------|
|                                     | Mean ± SD   | Mean ± SD   | Mean ± SD   |                       |
| Sand percentage                     | 61.9 ± 19.0 | 51.4 ± 7.9  | 88 ± 1.4    | <0.001                |
| Clay percentage                     | 12.3 ± 4.5  | 14.4 ± 3.3  | 7 ± 1.4     | <0.001                |
| pH                                  | 4.2 ± 0.2   | 4.1 ± 0.2   | 4.4 ± 0.3   | 0.245                 |
| Organic matter percentage           | 2.2 ± 1.2   | 2.8 ± 0.9   | 0.8 ± 0.1   | <0.001                |
| Phosphorous ppm                     | 2.1 ± 0.7   | 2.1 ± 0.6   | 1.9 ± 0.9   | <0.001                |
| Potassium ppm                       | 55.4 ± 23.5 | 44.6 ± 19.9 | 82.5 ± 19.1 | <0.001                |
| Carbon percentage                   | 1.4 ± 0.7   | 1.5 ± 0.7   | 1.2 ± 0.9   | 0.014                 |
| <sup>a</sup> t test <i>p</i> -value |             |             |             |                       |

**TABLE S4** Height (cm) of individual plants of *Himatanthus tarapotensis*, per month of evaluation (Apr = April; May = May; Jun = June; Jul = July; Aug = August; Sep = September; Oct = October; Nov = November; Dec = December; Jan = January; Feb = February; Mar = March)

| Plants<br>Specimen<br>Code | Months |     |     |       |     |     |      |     |     |     |     |     | Total |
|----------------------------|--------|-----|-----|-------|-----|-----|------|-----|-----|-----|-----|-----|-------|
|                            | 2014   |     |     |       |     |     | 2015 |     |     |     |     |     |       |
|                            | Apr    | May | Jun | Jul   | Aug | Sep | Oct  | Nov | Dec | Jan | Feb | Mar |       |
| 01                         | 243.6  |     |     | 247.5 |     |     |      | 251 |     |     |     |     | 253   |
| 02                         | 242    |     |     | 277.4 |     |     |      | 312 |     |     |     |     | 360   |
| 03                         | 160.9  |     |     | 163   |     |     |      | 163 |     |     |     |     | 172   |
| 04                         | 276    |     |     | 277.3 |     |     |      | 302 |     |     |     |     | 302   |
| 05                         | 303    |     |     | 306   |     |     |      | 306 |     |     |     |     | 310   |
| 06                         | 150    |     |     | 154.5 |     |     |      | 183 |     |     |     |     | 196   |
| 07                         | 247    |     |     | 260   |     |     |      | 271 |     |     |     |     | 288   |
| 08                         | 175    |     |     | 201   |     |     |      | 231 |     |     |     |     | 238   |
| 09                         | 97     |     |     | 102   |     |     |      | 124 |     |     |     |     | 127   |
| 10                         | 417    |     |     | 460   |     |     |      | 510 |     |     |     |     | 550   |
| 11                         | 288    |     |     | 288   |     |     |      | 294 |     |     |     |     | 297   |
| 12                         | 135    |     |     | 135   |     |     |      | 135 |     |     |     |     | 135   |
| 13                         | 245.5  |     |     | 253   |     |     |      | 253 |     |     |     |     | 257   |
| 14                         | 175    |     |     | 192   |     |     |      | 208 |     |     |     |     | 252   |
| 15                         | 105    |     |     | 111   |     |     |      | 122 |     |     |     |     | 130   |
| 16                         | 122    |     |     | 122   |     |     |      | 122 |     |     |     |     | 122   |
| 17                         | 146.5  |     |     | 146.5 |     |     |      | 152 |     |     |     |     | 156   |

**TABLE S5** Abundance (number of individuals) of the insect herbivore *Isognathus leachii*, per individual plants of *Himatanthus tarapotensis* and month of evaluation (Apr = April; May = May; Jun = June; Jul = July; Aug = August; Sep = September; Oct = October; Nov = November; Dec = December; Jan = January; Feb = February; Mar = March)

| Plants<br>Specimen<br>Code | Months |     |     |     |     |     |      |     |     |     |     |     | Total |
|----------------------------|--------|-----|-----|-----|-----|-----|------|-----|-----|-----|-----|-----|-------|
|                            | 2014   |     |     |     |     |     | 2015 |     |     |     |     |     |       |
|                            | Apr    | May | Jun | Jul | Aug | Sep | Oct  | Nov | Dec | Jan | Feb | Mar |       |
| 01                         | 0      | 9   | 1   | 4   | 4   | 2   | 9    | 1   | 7   | 1   | 0   | 5   | 43    |
| 02                         | 0      | 3   | 0   | 3   | 1   | 2   | 1    | 0   | 13  | 6   | 0   | 0   | 29    |
| 03                         | 0      | 3   | 0   | 1   | 0   | 0   | 2    | 0   | 2   | 6   | 0   | 2   | 16    |
| 04                         | 0      | 5   | 0   | 2   | 2   | 3   | 2    | 1   | 5   | 6   | 0   | 0   | 26    |
| 05                         | 6      | 1   | 0   | 0   | 6   | 26  | 9    | 0   | 0   | 0   | 0   | 0   | 48    |
| 06                         | 0      | 2   | 0   | 0   | 0   | 3   | 10   | 0   | 0   | 0   | 0   | 2   | 17    |
| 07                         | 0      | 0   | 0   | 0   | 5   | 7   | 7    | 8   | 11  | 4   | 0   | 0   | 42    |
| 08                         | 0      | 0   | 0   | 4   | 2   | 1   | 6    | 7   | 2   | 1   | 0   | 0   | 23    |
| 09                         | 0      | 1   | 1   | 0   | 0   | 0   | 1    | 0   | 2   | 1   | 0   | 0   | 6     |
| 10                         | 0      | 2   | 0   | 1   | 0   | 0   | 2    | 0   | 0   | 0   | 0   | 0   | 5     |
| 11                         | 0      | 0   | 0   | 0   | 1   | 3   | 1    | 0   | 0   | 1   | 0   | 0   | 6     |
| 12                         | 0      | 1   | 0   | 1   | 7   | 2   | 0    | 1   | 0   | 1   | 0   | 0   | 13    |
| 13                         | 0      | 1   | 1   | 3   | 15  | 1   | 0    | 0   | 1   | 1   | 0   | 0   | 23    |
| 14                         | 0      | 0   | 0   | 0   | 0   | 0   | 0    | 0   | 0   | 0   | 0   | 0   | 0     |
| 15                         | 0      | 0   | 0   | 0   | 0   | 0   | 0    | 0   | 3   | 1   | 0   | 0   | 4     |
| 16                         | 0      | 0   | 0   | 1   | 0   | 0   | 0    | 0   | 0   | 0   | 0   | 0   | 1     |
| 17                         | 0      | 0   | 0   | 0   | 0   | 0   | 0    | 0   | 1   | 6   | 0   | 0   | 7     |
